# Supplementary material
Source: PubMed Central journal article supplement (PMC4062604)

## Supplemental information

### Microbicidal effects of $\alpha$ - and $\theta$ -defensins against antibiotic-resistant *Staphylococcus aureus* and *Pseudomonas aeruginosa*

Kenneth P. Tai<sup>1</sup>, Karishma Kamdar<sup>1§</sup>, Jason Yamaki<sup>2</sup>, Valerie V. Le<sup>1</sup>, Dat Tran<sup>1</sup>, Patti Tran<sup>1</sup>  
Michael E. Selsted<sup>1</sup>, André J. Ouellette<sup>1</sup>, Annie Wong-Beringer<sup>2</sup>.

Supplemental Figure S1. Crp-4 and RMAD-4 bactericidal activity against PA sputum isolates.

Supplemental Figure S2. Sensitivity of *P. aeruginosa* urinary tract isolates to Crp-4 and RMAD-4.

Supplemental Figure S3. Sensitivity of PA clinical isolates from patient wounds to Crp-4 and RMAD-4.

**Supplemental Figure S1. Crp-4 and RMAD-4 bactericidal activity against PA sputum isolates.**

Cip<sup>R</sup>, 05038 (A), 05077 (B), ML121 (C) and Cip<sup>S</sup>, ML75 (D) sputum isolates of *P. aeruginosa* were tested for sensitivity to Crp-4 and RMAD-4. No relationship exists between Cip<sup>R</sup> and  $\alpha$ -defensin activity in the triplicate assays performed. Error bars denote standard deviation from the mean. Symbols: Crp-4 (-●-) and RMAD-4 (-○-).

**Supplemental Figure S2. Sensitivity of *P. aeruginosa* urinary tract isolates to Crp-4 and RMAD-4.**

PA strains WB 11 (A), WB 20 (B), and WB 30 were tested against 1.5 and 6  $\mu$ M peptide concentrations of Crp-4 and RMAD-4, and both peptides Crp-4 were active against all strains tested. Each condition was performed in triplicate. Error bars denote standard deviation from the mean. Symbols: Crp-4 (-●-) and RMAD-4 (-○-).

**Supplemental Figure S3. Sensitivity of PA clinical isolates from patient wounds to Crp-4 and**

**RMAD-4.** PA strains WB 42 (A), WB 16 (B), and WB 15 (C) isolates from patient wounds were tested against 1.5 and 6  $\mu$ M peptide concentrations of Crp-4 and RMAD-4. Wound isolates were sensitive to both Crp-4 and RMAD-4 in the triplicate assays performed. Error bars denote standard deviation from the mean. Symbols: Crp-4 (-●-) and RMAD-4 (-○-).

Supplemental Figure 1

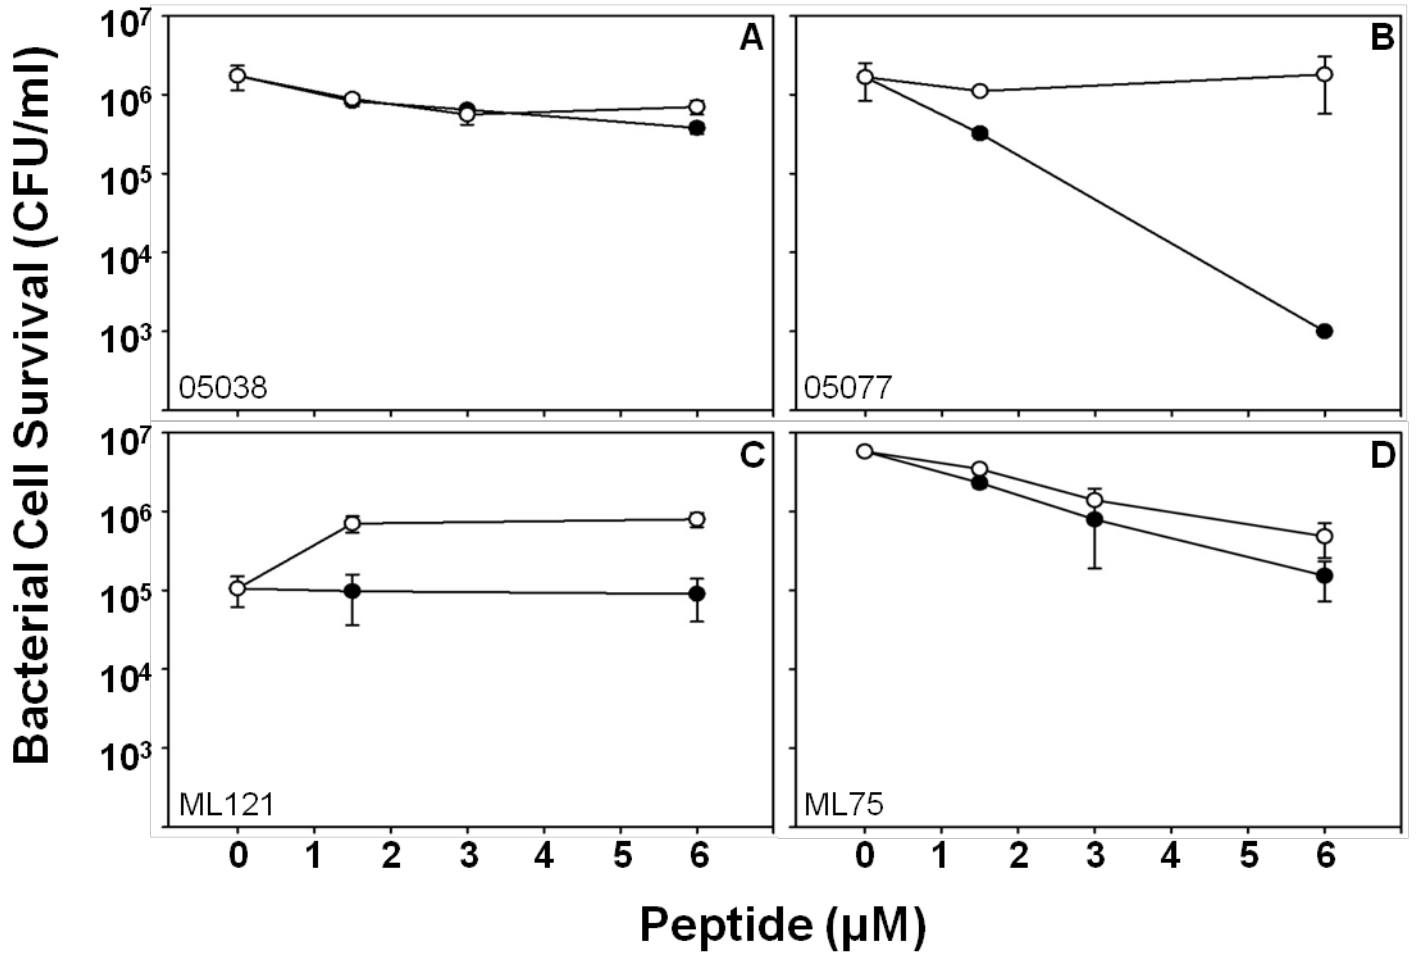

Supplemental 2

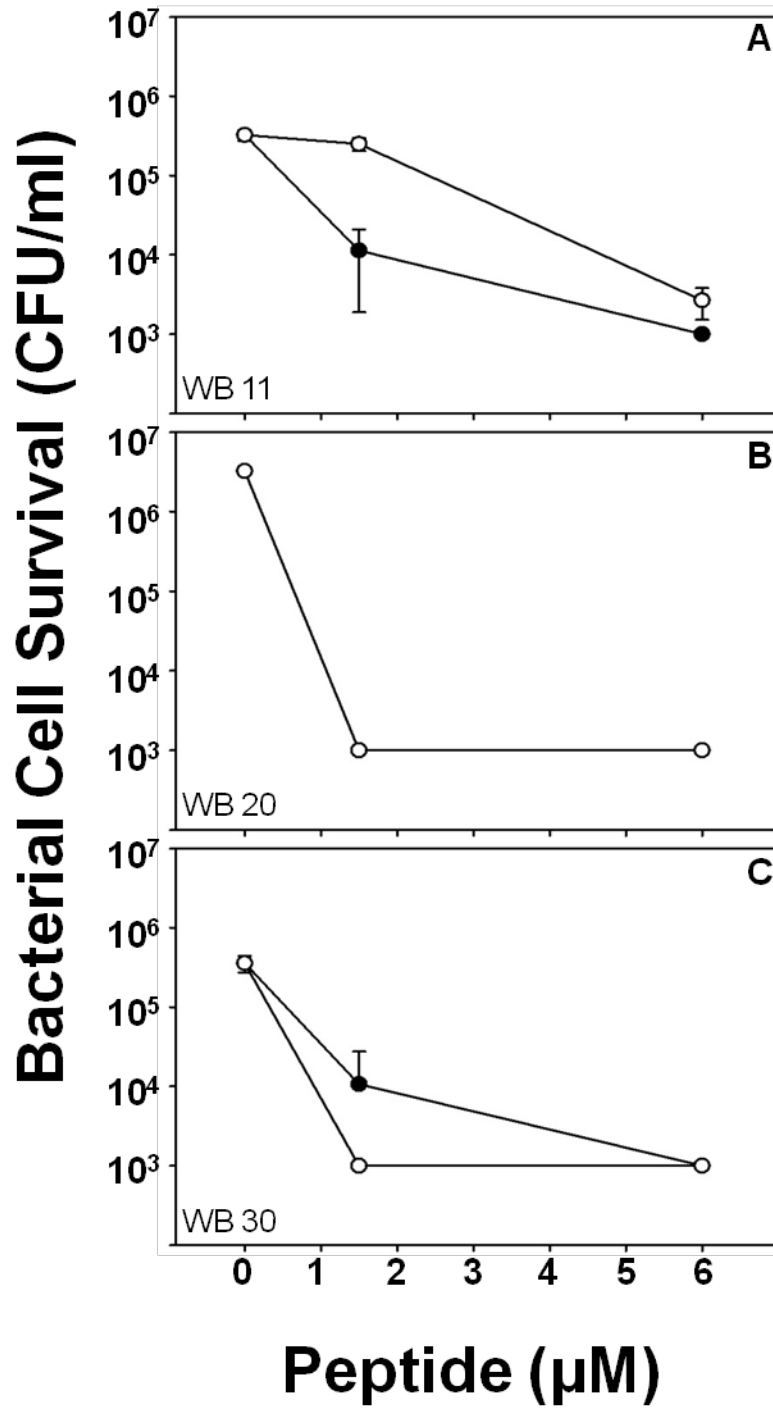

Supplemental Figure 3

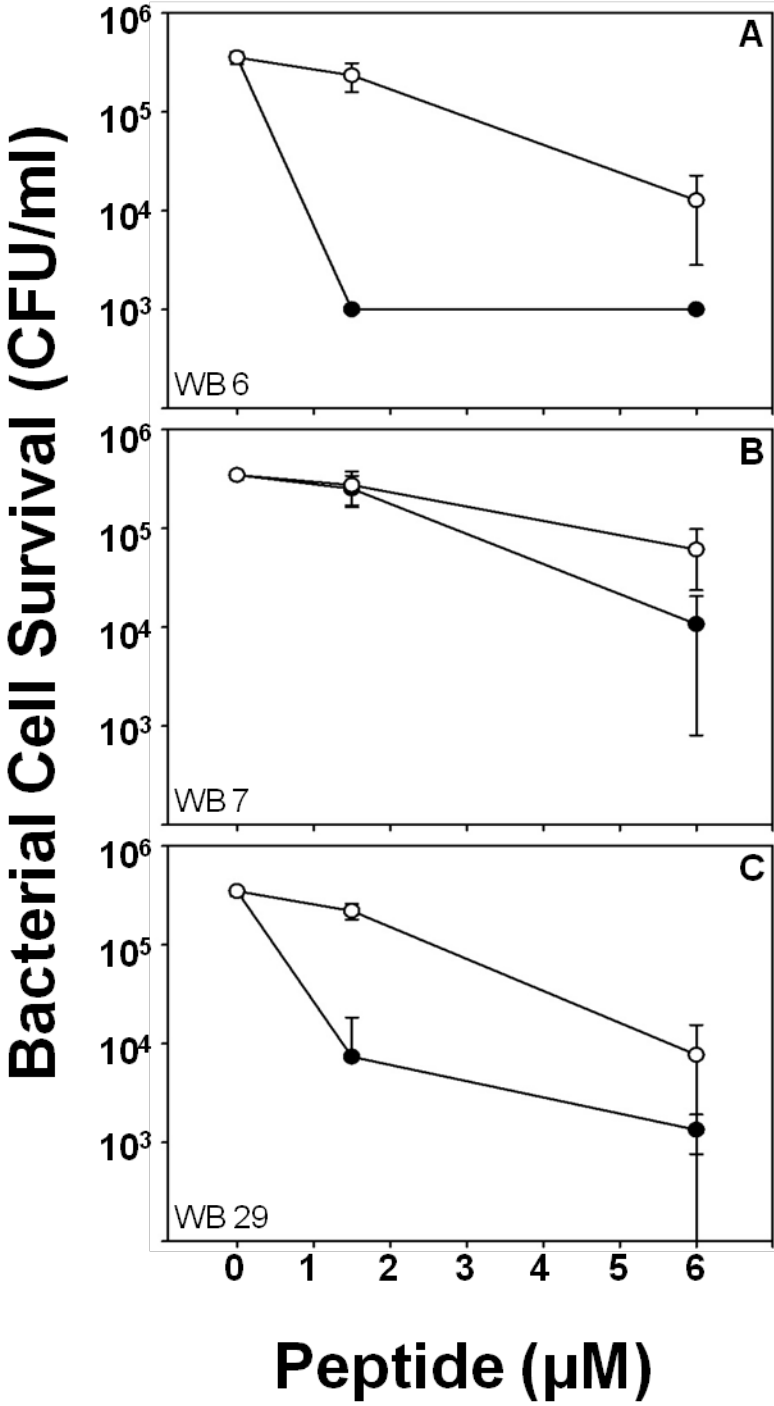

Supplement: NIHMS591229-supplement-Supplemental_information.pdf [file NIHMS591229-supplement-Supplemental_information.pdf]
